# Supplementary material for: Network pharmacology-based approach to explore the underlying mechanism of sinomenine on sepsis-induced myocardial injury in rats
Source: Front Pharmacol. 2023 Jun 14;14:1138858. doi: 10.3389/fphar.2023.1138858 (PMC10303801; doi:10.3389/fphar.2023.1138858)
Supplement: Supplementary file 1 [file Table2.XLSX]

## Sheet: Sheet1
Table S2. sepsis-related gene obtained from public databases
disease	Target
sepsis	TNF
sepsis	IL6
sepsis	IL10
sepsis	CRP
sepsis	CXCL8
sepsis	TLR4
sepsis	CD14
sepsis	IL1B
sepsis	CALCA
sepsis	TLR2
sepsis	LBP
sepsis	ELANE
sepsis	MIF
sepsis	HMGB1
sepsis	GALT
sepsis	F5
sepsis	IL18
sepsis	IL1RN
sepsis	GALE
sepsis	NOS2
sepsis	SERPINE1
sepsis	TLR5
sepsis	MYLK
sepsis	TREM1
sepsis	SELE
sepsis	MYD88
sepsis	MBL2
sepsis	TLR9
sepsis	IFNG
sepsis	GALM
sepsis	BTK
sepsis	F2
sepsis	THBD
sepsis	MYH11
sepsis	ALB
sepsis	CSF3
sepsis	SERPINC1
sepsis	RAC2
sepsis	CD40LG
sepsis	HLA-A
sepsis	APC
sepsis	F3
sepsis	AK2
sepsis	RPSA
sepsis	CASP12
sepsis	RAG1
sepsis	HLA-B
sepsis	IKZF1
sepsis	FCGR3B
sepsis	VCAM1
sepsis	LMOD1
sepsis	PROCR
sepsis	ABCA12
sepsis	ITGAM
sepsis	LTA
sepsis	CCR6
sepsis	IL1R1
sepsis	CTLA4
sepsis	SERAC1
sepsis	ANGPT2
sepsis	MIR150
sepsis	PLA2G2A
sepsis	NKX2-5
sepsis	LCN2
sepsis	ACTG2
sepsis	XIAP
sepsis	PLEC
sepsis	PF4
sepsis	ITGB2
sepsis	PROC
sepsis	CCL2
sepsis	IL7R
sepsis	IL17A
sepsis	VEGFA
sepsis	SFTPB
sepsis	GALK1
sepsis	TLR1
sepsis	BPI
sepsis	PTAFR
sepsis	NOD2
sepsis	MMP9
sepsis	IGHMBP2
sepsis	RALGAPA1
sepsis	ACE
sepsis	LTF
sepsis	PDCD1
sepsis	SELL
sepsis	TF
sepsis	ICAM1
sepsis	CLMP
sepsis	MPO
sepsis	SPINK5
sepsis	IL2RG
sepsis	FCGR1A
sepsis	IL2
sepsis	FOXP3
sepsis	S1PR3
sepsis	PTX3
sepsis	SOD1
sepsis	CXCL2
sepsis	ADM
sepsis	TGM1
sepsis	IL1A
sepsis	IL13
sepsis	HYOU1
sepsis	CXCL5
sepsis	LY96
sepsis	ADAMTS13
sepsis	TFRC
sepsis	HBB
sepsis	COG4
sepsis	NPPB
sepsis	CPS1
sepsis	IL2RA
sepsis	CXCR4
sepsis	C5AR2
sepsis	CTCF
sepsis	INS
sepsis	IL4
sepsis	TIMP1
sepsis	WAS
sepsis	NFE2L2
sepsis	MASP2
sepsis	CD4
sepsis	CTNNB1
sepsis	PLA2G7
sepsis	ADA
sepsis	EDNRB
sepsis	BCL2
sepsis	FAS
sepsis	PARK7
sepsis	ABCA3
sepsis	CYBB
sepsis	IRAK3
sepsis	CSF2
sepsis	VWF
sepsis	SFTPC
sepsis	FLNA
sepsis	LOC112042785
sepsis	CP
sepsis	LACTB
sepsis	NCF1
sepsis	FASLG
sepsis	MNX1
sepsis	NOS3
sepsis	IDO1
sepsis	DCLRE1C
sepsis	SELP
sepsis	GPT
sepsis	KRT1
sepsis	CASP3
sepsis	FCGR2A
sepsis	THPO
sepsis	CD274
sepsis	MRTFA
sepsis	MTHFR
sepsis	MIR146A
sepsis	NFKB2
sepsis	CD79A
sepsis	CTSG
sepsis	S100B
sepsis	MIR21
sepsis	G6PC3
sepsis	CD79B
sepsis	BLNK
sepsis	PGM3
sepsis	LRRC8A
sepsis	IGHM
sepsis	C5AR1
sepsis	KRT10
sepsis	ATP7A
sepsis	MFHAS1
sepsis	CXCL1
sepsis	HMOX1
sepsis	STAT3
sepsis	CXCR2
sepsis	ANGPT1
sepsis	CYP4F22
sepsis	ALG12
sepsis	ITGAX
sepsis	PTPRC
sepsis	POMC
sepsis	TTR
sepsis	LRBA
sepsis	FABP2
sepsis	ALOXE3
sepsis	NIPAL4
sepsis	IRAK1
sepsis	DLL1
sepsis	PON1
sepsis	RMRP
sepsis	CD27
sepsis	CFI
sepsis	ERBB2
sepsis	KRT5
sepsis	KRT14
sepsis	G6PD
sepsis	HLA-DQB1
sepsis	PRF1
sepsis	BMP6
sepsis	CERS3
sepsis	PIK3R1
sepsis	CAMP
sepsis	SULT2B1
sepsis	ALOX12B
sepsis	SDR9C7
sepsis	LIPN
sepsis	SNHG31
sepsis	TRAF6
sepsis	NEAT1
sepsis	MNX1-AS2
sepsis	CD40
sepsis	PPARG
sepsis	IL1RAPL2
sepsis	C5
sepsis	LAMA3
sepsis	CHD7
sepsis	FERMT3
sepsis	WIPF1
sepsis	TREX1
sepsis	PKP1
sepsis	HOTAIR
sepsis	PRTN3
sepsis	IFNA1
sepsis	CD86
sepsis	GJB2
sepsis	PIK3C2A
sepsis	SRC
sepsis	MIR125A
sepsis	MIR223
sepsis	C3
sepsis	HSPA4
sepsis	PNPLA1
sepsis	EPO
sepsis	F2R
sepsis	CFH
sepsis	C4A
sepsis	CYBA
sepsis	IL2RB
sepsis	NFKB1
sepsis	IL1R2
sepsis	ITGB4
sepsis	IL27
sepsis	AGER
sepsis	MAPK14
sepsis	LAMC2
sepsis	LAMB3
sepsis	SMARCD2
sepsis	SAMD9
sepsis	TIRAP
sepsis	HIF1A
sepsis	JUN
sepsis	SBDS
sepsis	APOE
sepsis	CYP1A2
sepsis	TNFRSF1A
sepsis	TGFB1
sepsis	EDN1
sepsis	C2
sepsis	HLCS
sepsis	KRT10-AS1
sepsis	NLRP3
sepsis	AVP
sepsis	PLAU
sepsis	FGF2
sepsis	GZMB
sepsis	TLR6
sepsis	S100A8
sepsis	MIR155
sepsis	PPIG
sepsis	MALAT1
sepsis	PLAT
sepsis	CD163
sepsis	CASP8
sepsis	SIRT1
sepsis	ESM1
sepsis	NR3C1
sepsis	RET
sepsis	ERBB3
sepsis	SMO
sepsis	ECE1
sepsis	NCF4
sepsis	GDNF
sepsis	LIG4
sepsis	NCF2
sepsis	EDN3
sepsis	ABCD1
sepsis	SREBF1
sepsis	TCF3
sepsis	SEMA3C
sepsis	SRP54
sepsis	ALG1
sepsis	IGLL1
sepsis	RAG2
sepsis	RNF13
sepsis	NRTN
sepsis	COX8A
sepsis	SEMA3D
sepsis	VPS33A
sepsis	MMUT
sepsis	DNAJC21
sepsis	YARS1
sepsis	EFL1
sepsis	CYBC1
sepsis	NEU1
sepsis	IRAK4
sepsis	MMP2
sepsis	PCSK9
sepsis	CXCL10
sepsis	CST3
sepsis	AMH
sepsis	IL7
sepsis	IL10RA
sepsis	CAT
sepsis	TNNI3
sepsis	ACOD1
sepsis	MIR122
sepsis	HSP90AA1
sepsis	RETN
sepsis	MAN2B1
sepsis	FOXN1
sepsis	GHR
sepsis	VIP
sepsis	HP
sepsis	SERPINF2
sepsis	IGF1
sepsis	VDR
sepsis	CD8A
sepsis	CYCS
sepsis	FLT1
sepsis	MMP8
sepsis	CFP
sepsis	MAPK1
sepsis	MEG3
sepsis	IL12B
sepsis	ANXA5
sepsis	CHIT1
sepsis	ENO2
sepsis	HLA-DRB1
sepsis	IL3
sepsis	APOA1
sepsis	AHSG
sepsis	S100A12
sepsis	REG1A
sepsis	LEP
sepsis	AKT1
sepsis	BAX
sepsis	IFNB1
sepsis	TNFRSF1B
sepsis	S100A9
sepsis	TIMP2
sepsis	CETP
sepsis	CCR5
sepsis	STAR
sepsis	H19
sepsis	HBG2
sepsis	NFKBIL1
sepsis	IL5
sepsis	CPB2
sepsis	TEK
sepsis	NAMPT
sepsis	TJP1
sepsis	CCL4
sepsis	ACTA1
sepsis	HBEGF
sepsis	AZU1
sepsis	GHRL
sepsis	CD27-AS1
sepsis	HLA-DRA
sepsis	SYK
sepsis	CR1
sepsis	GPR182
sepsis	IL4R
sepsis	AQP1
sepsis	TFF3
sepsis	MAP3K7
sepsis	IL11
sepsis	SDC1
sepsis	GP1BA
sepsis	XDH
sepsis	ITGA4
sepsis	FER
sepsis	CDH5
sepsis	AQP5
sepsis	OCLN
sepsis	PLG
sepsis	CCL5
sepsis	PPARA
sepsis	HAVCR2
sepsis	IDH1
sepsis	CYP11B1
sepsis	PRNP
sepsis	SGSH
sepsis	SOX10
sepsis	GJB6
sepsis	SLC27A4
sepsis	NAGLU
sepsis	MMACHC
sepsis	TBX1
sepsis	CARD14
sepsis	ARPC1B
sepsis	ATRIP
sepsis	HGSNAT
sepsis	SRP19
sepsis	AP4E1
sepsis	MAL
sepsis	IGKC
sepsis	C2orf69
sepsis	IGHG2
sepsis	SRPRA
sepsis	DOP1A
sepsis	NCF4-AS1
sepsis	ATRIP-TREX1
sepsis	LOC106799833
sepsis	HSCR5
sepsis	HSCR8
sepsis	ENDOVESL
sepsis	ARCI7
sepsis	HSCR6
sepsis	HSCR7
sepsis	HSCR9
sepsis	NOS1
sepsis	MAPK3
sepsis	IL33
sepsis	KNG1
sepsis	BCL2L1
sepsis	ADORA2A
sepsis	FGA
sepsis	THBS1
sepsis	HSPA1B
sepsis	CRNDE
sepsis	AK8
sepsis	IRF3
sepsis	SMPD1
sepsis	TFPI
sepsis	SFTPD
sepsis	CARD11
sepsis	FGF23
sepsis	CHI3L1
sepsis	TP53
sepsis	PDGFB
sepsis	AOC1
sepsis	DEFB4A
sepsis	CXCR3
sepsis	SERPINB2
sepsis	MIR146B
sepsis	FN1
sepsis	MIR574
sepsis	GSN
sepsis	FCGR3A
sepsis	CD177
sepsis	PRL
sepsis	MMP1
sepsis	ARNTL
sepsis	NLRX1
sepsis	MT-ND1
sepsis	MIR143
sepsis	ADAM10
sepsis	CXCL12
sepsis	DEFA1
sepsis	HSPA12B
sepsis	MCL1
sepsis	ADRB2
sepsis	IL18R1
sepsis	SLC17A5
sepsis	HSPA1A
sepsis	PTMA
sepsis	CCL3
sepsis	SOD2
sepsis	LIF
sepsis	GAS6
sepsis	CIRBP
sepsis	SUCLG2
sepsis	ACR
sepsis	MORN2
sepsis	CFB
sepsis	UCP2
sepsis	PGF
sepsis	MIR126
sepsis	NPPA
sepsis	ADAM17
sepsis	WNT5A
sepsis	TXN
sepsis	TNFSF10
sepsis	TLR10
sepsis	IPO9-AS1
sepsis	BID
sepsis	MEFV
sepsis	IL22
sepsis	PLAUR
sepsis	TPMT
sepsis	TPO
sepsis	MVK
sepsis	C9
sepsis	FABP1
sepsis	EGF
sepsis	STAT1
sepsis	MIR27A
sepsis	TLR3
sepsis	BCL2L11
sepsis	FPR1
sepsis	MIR125B2
sepsis	CASP1
sepsis	IL6R
sepsis	HRG
sepsis	CSF1
sepsis	SERPINA6
sepsis	XK
sepsis	SLC2A2
sepsis	AKR1B1
sepsis	MAPK8
sepsis	MIR495
sepsis	TRAF1
sepsis	CD69
sepsis	BTLA
sepsis	STAT5A
sepsis	F9
sepsis	DUSP1
sepsis	RPS27A
sepsis	CHRNA7
sepsis	MSN
sepsis	TOLLIP
sepsis	GC
sepsis	F2RL1
sepsis	GRP
sepsis	GP6
sepsis	FGB
sepsis	UGT1A1
sepsis	CISH
sepsis	FGL2
sepsis	CCL11
sepsis	PTK2B
sepsis	MIR125B1
sepsis	BTD
sepsis	ICOSLG
sepsis	FURIN
sepsis	MMP10
sepsis	DEFB1
sepsis	ITGAL
sepsis	IL15
sepsis	MB
sepsis	IL21
sepsis	SMAD3
sepsis	CXCR1
sepsis	FOXO1
sepsis	FUT2
sepsis	HGF
sepsis	SOCS3
sepsis	TUG1
sepsis	TREM2
sepsis	MIR92A1
sepsis	MIR92A2
sepsis	GALK2
sepsis	AGTR1
sepsis	MIR483
sepsis	H2AC18
sepsis	CD36
sepsis	HSPA5
sepsis	PINK1
sepsis	CXCL9
sepsis	SERPING1
sepsis	APOM
sepsis	SERPINA3
sepsis	ABCC2
sepsis	IRGM
sepsis	MAP2K3
sepsis	NPC2
sepsis	RAP1A
sepsis	APLN
sepsis	IFNA2
sepsis	ADAMTSL1
sepsis	GRK2
sepsis	ACP1
sepsis	EDNRA
sepsis	IGHE
sepsis	CALCRL
sepsis	APOL1
sepsis	CX3CR1
sepsis	RAMP2
sepsis	HULC
sepsis	MIR499A
sepsis	MIR545
sepsis	CYP2B6
sepsis	SLC6A8
sepsis	CD24
sepsis	PECAM1
sepsis	PMM2
sepsis	ACADM
sepsis	ALG2
sepsis	GFAP
sepsis	CD44
sepsis	P2RX7
sepsis	DEFA3
sepsis	ACSM6
sepsis	S1PR1
sepsis	NRG1
sepsis	DKC1
sepsis	ADAR
sepsis	DPP4
sepsis	TAB2
sepsis	C1S
sepsis	SPP1
sepsis	MIR31
sepsis	MIR199A1
sepsis	HLA-G
sepsis	CD244
sepsis	SELENOP
sepsis	MIR210
sepsis	MIR93
sepsis	HMOX2
sepsis	HSPD1
sepsis	SERPINF1
sepsis	ATG16L1
sepsis	PI3
sepsis	CBS
sepsis	DDX58
sepsis	KIT
sepsis	HSPA1L
sepsis	MIR128-1
sepsis	JAK3
sepsis	TICAM1
sepsis	UGDH
sepsis	CRYAA
sepsis	UGP2
sepsis	UAP1
sepsis	CLC
sepsis	TNFRSF11B
sepsis	CLDN2
sepsis	GJA1
sepsis	BDNF
sepsis	NPY
sepsis	CIITA
sepsis	CEACAM1
sepsis	GPX3
sepsis	IL1RL1
sepsis	MIR497
sepsis	ATF3
sepsis	PLA2G6
sepsis	PNPLA2
sepsis	TNFRSF18
sepsis	SPN
sepsis	CYP2D6
sepsis	ACTC1
sepsis	PRKCA
sepsis	APOB
sepsis	IL32
sepsis	GAS5
sepsis	GSDMD
sepsis	NT5E
sepsis	MT-CO1
sepsis	KITLG
sepsis	LEPQTL1
sepsis	EZH2
sepsis	PLK1
sepsis	CASC2
sepsis	MIR19A
sepsis	JAK1
sepsis	APP
sepsis	TSLP
sepsis	TMPRSS15
sepsis	SAA1
sepsis	IGFBP1
sepsis	SERPINA4
sepsis	GRK5
sepsis	STARD3NL
sepsis	NKX2-6
sepsis	ADM2
sepsis	MIR34B
sepsis	KRT18P32
sepsis	ACE2
sepsis	ALOX5
sepsis	CTSL
sepsis	LCP2
sepsis	PADI4
sepsis	RBMS1
sepsis	PTEN
sepsis	KRAS
sepsis	IL37
sepsis	GLS
sepsis	RIPK3
sepsis	IL12A
sepsis	CD3D
sepsis	IFNAR1
sepsis	AIRE
sepsis	GFI1
sepsis	PDGFRB
sepsis	PAH
sepsis	PGM1
sepsis	SLC25A13
sepsis	LCT
sepsis	DIAPH2
sepsis	SLC5A3
sepsis	CD109
sepsis	GDF9
sepsis	FLG
sepsis	BMP15
sepsis	COG7
sepsis	LGALS7
sepsis	SYCE1
sepsis	ELOF1
sepsis	FAM124B
sepsis	LGALS7B
sepsis	DIRAS3
sepsis	PNP
sepsis	C4B
sepsis	CSN1S1
sepsis	GGT1
sepsis	MYC
sepsis	OLFM4
sepsis	CYP1A1
sepsis	MMP16
sepsis	FABP3
sepsis	PICK1
sepsis	SERPINA7
sepsis	MIR181A1
sepsis	HSPG2
sepsis	SLC11A1
sepsis	PARP1
sepsis	CDKN3
sepsis	ELAVL1
sepsis	PDE7A
sepsis	CYP3A4
sepsis	LYN
sepsis	AIM2
sepsis	ADIPOQ
sepsis	TNFRSF6B
sepsis	LST1
sepsis	GBA
sepsis	STK4
sepsis	PLCG2
sepsis	HSPA8
sepsis	LGALS3
sepsis	FBXO32
sepsis	EGR1
sepsis	NOTCH4
sepsis	TNFSF14
sepsis	CCHCR1
sepsis	CYP2C9
sepsis	CYP2C19
sepsis	HSPB1
sepsis	PAFAH1B1
sepsis	FOXO3
sepsis	HPSE
sepsis	TAFAZZIN
sepsis	APOH
sepsis	TLR8
sepsis	ACLY
sepsis	GDF15
sepsis	DDIT4
sepsis	SULT1A3
sepsis	PNOC
sepsis	TBX21
sepsis	NHEJ1
sepsis	KLK7
sepsis	FAH
sepsis	INSR
sepsis	BRD4
sepsis	PDE4A
sepsis	CSRP1
sepsis	HDAC6
sepsis	GRN
sepsis	VOPP1
sepsis	MIR218-1
sepsis	AQP4
sepsis	DSG1
sepsis	MUC5AC
sepsis	SERPINA1
sepsis	MTOR
sepsis	ITGB1
sepsis	PROZ
sepsis	APOC1
sepsis	MIR195
sepsis	CLOCK
sepsis	PYCARD
sepsis	CORT
sepsis	TAB3
sepsis	STIM1
sepsis	PLTP
sepsis	CD80
sepsis	TMSB4X
sepsis	CXCL6
sepsis	VKORC1
sepsis	IGFBP3
sepsis	BCKDK
sepsis	MIR23B
sepsis	LYZ
sepsis	PTGS2
sepsis	SLC2A4
sepsis	NTN1
sepsis	SIRT6
sepsis	CD63
sepsis	C1D
sepsis	MIR141
sepsis	LEPR
sepsis	ENG
sepsis	BIRC5
sepsis	A2M
sepsis	CS
sepsis	FABP4
sepsis	STAP2
sepsis	DUSP22
sepsis	CDKN2B-AS1
sepsis	MIRLET7B
sepsis	MIR452
sepsis	CD19
sepsis	TNFRSF13B
sepsis	ISG15
sepsis	TNFSF13B
sepsis	PCSK5
sepsis	PLEK
sepsis	ENTPD1
sepsis	DES
sepsis	LMAN1
sepsis	JAK2
sepsis	CTH
sepsis	OSM
sepsis	ANO1
sepsis	ALPL
sepsis	GLUL
sepsis	CD59
sepsis	CYP2E1
sepsis	PDE4B
sepsis	FCN2
sepsis	AGPAT1
sepsis	TREML1
sepsis	MIR23A
sepsis	TGFBR2
sepsis	P2RY12
sepsis	PRKCI
sepsis	HDAC5
sepsis	MC1R
sepsis	TMPO
sepsis	CFLAR
sepsis	BAK1
sepsis	GRPR
sepsis	CCL20
sepsis	KDM6B
sepsis	PDCD1LG2
sepsis	MIR155HG
sepsis	TCN2
sepsis	CPT1A
sepsis	AQP2
sepsis	SLIT2
sepsis	CFD
sepsis	GZMA
sepsis	DANCR
sepsis	MIR15A
sepsis	MDM2
sepsis	PTPN11
sepsis	PROS1
sepsis	ODC1
sepsis	AVPR2
sepsis	PAX5
sepsis	FEN1
sepsis	GP9
sepsis	AZGP1
sepsis	SLC10A1
sepsis	GDF2
sepsis	CXCL13
sepsis	BGLAP
sepsis	TNFSF4
sepsis	EDIL3
sepsis	IL31
sepsis	H3C1
sepsis	XIST
sepsis	MIR26B
sepsis	MIR375
sepsis	THRIL
sepsis	HNP1
sepsis	NAXE
sepsis	SMAD4
sepsis	F10
sepsis	RPS6KB1
sepsis	PDP1
sepsis	DIABLO
sepsis	TRPM7
sepsis	APOC3
sepsis	MKNK1
sepsis	PRSS1
sepsis	HSPA2
sepsis	CHGA
sepsis	SOCS1
sepsis	ATG5
sepsis	TFAM
sepsis	SOCS6
sepsis	RAMP3
sepsis	SORBS2
sepsis	SPOCK1
sepsis	SDF4
sepsis	AKIRIN1
sepsis	ZBTB7C
sepsis	MIR140
sepsis	MIR29A
sepsis	MIR205
sepsis	TRB
sepsis	MIR494
sepsis	MIR1298
sepsis	ST2
sepsis	DEFA1A3
sepsis	CRBN
sepsis	FNDC5
sepsis	IL12RB1
sepsis	TOP2A
sepsis	TGFBI
sepsis	MT1
sepsis	ATP5F1A
sepsis	MT2
sepsis	ADORA2B
sepsis	HSPA9
sepsis	ABCB1B
sepsis	OTC
sepsis	RPL4
sepsis	RPL9
sepsis	ADORA1
sepsis	ESR2
sepsis	CRF
sepsis	BDKRB2
sepsis	AVPR1A
sepsis	GLRA1
sepsis	ENPP3
sepsis	ADRB1
sepsis	ASGR1
sepsis	ASGR2
sepsis	CASP4
sepsis	CBLB
sepsis	FCER1G
sepsis	FPS
sepsis	GH1
sepsis	HMGCS2
sepsis	IKBKG
sepsis	FOXP3,IPEX
sepsis	JUP
sepsis	LIS1
sepsis	MARCO
sepsis	MLH1
sepsis	NASP
sepsis	NTS
sepsis	PTGDR2
sepsis	PTGER4
sepsis	SLC12A2
sepsis	SPHK1
sepsis	ST3GAL4
sepsis	TBCE
sepsis	TBG
sepsis	TYROBP
